# Supplementary material for: Enhancing the bioaccessibility of puerarin through the collaboration of high internal phase Pickering emulsions with β-carotene
Source: Royal Society of Chemistry journal article supplement (doi:10.1039/d1fo03697a), 2022-01-01

3D CLSM images of the meat protein particles stabilized HIPPE (Scale bars =  
100  $\mu\text{m}$ ) (Figure S1).

Figure S1

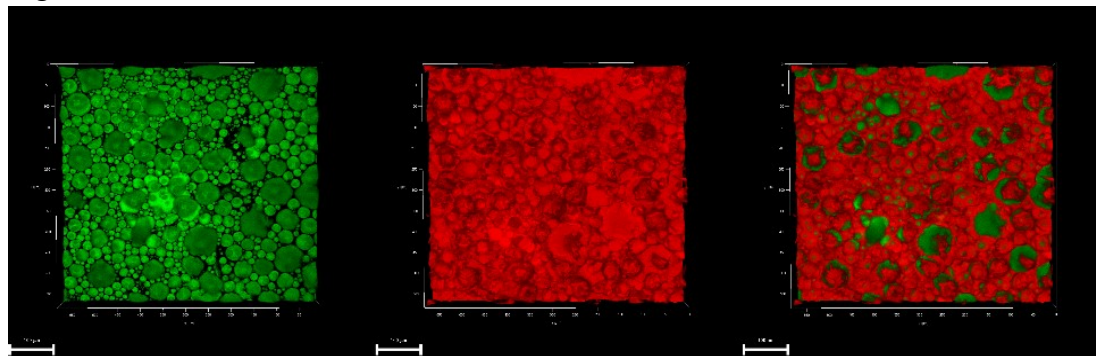

Supplement: d1fo03697a1.pdf [file d1fo03697a1.pdf]
